# Supplementary material for: Mie-coupled bound guided states in nanowire geometric superlattices
Source: PubMed Central journal article supplement (PMC6050327; doi:10.1038/s41467-018-05224-2), 2018-07-17
Supplement: 41467_2018_5224_MOESM1_ESM.pdf [file 41467_2018_5224_MOESM1_ESM.pdf]

*Supplementary Information for:*

# Mie-Coupled Bound Guided States in Nanowire Geometric Superlattices

*Seokhyoung Kim<sup>1</sup>, Kyoung-Ho Kim<sup>1,2</sup>, David J. Hill<sup>1</sup>, Hong-Gyu Park<sup>2\*</sup>, and James F. Cahoon<sup>1\*</sup>*

Supplementary Information includes:

Supplementary Figures 1-11

Supplementary Tables 1-2

Supplementary Movie 1-4 captions

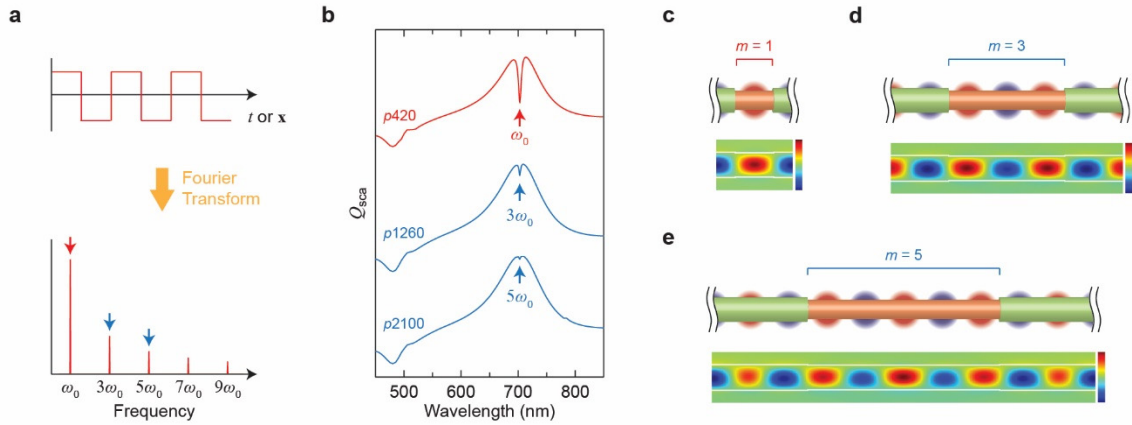

**Supplementary Figure 1 | Fourier selection of BGS by higher harmonics.** **a**, A square wave representing a GSL structure and its Fourier series that consists of odd-numbered harmonics of the fundamental frequency. **b**,  $Q_{sca}$  spectrum of NW GSLs with  $d = 140$  nm and  $e = 135$  nm of three different values of  $p = 420$  nm (top),  $p = 1260$  nm (middle) and  $p = 2100$  nm (bottom). Pitch was varied to tailor higher harmonic interactions with a Mie resonance fixed at the same wavelength. **c-e**, Schematic and calculated magnetic field profiles for the GSLs in panel b at the dip, showing a BGS mode with  $m = 1$  (**c**),  $m = 3$  (**d**) and  $m = 5$  (**e**) antinodes confined at each segment.

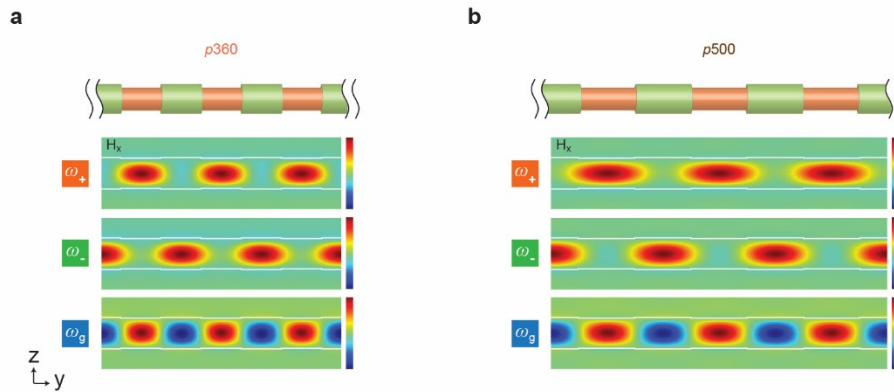

**Supplementary Figure 2 | Calculated Magnetic Field Profiles of a GSL with varying pitch.** **a-b**, Schematic and calculated magnetic field profiles for a GSL with  $p = 360$  nm (**a**) and  $p = 500$  nm (**b**) from Figure 1c, showing coupled  $TM_{11}$  dipolar modes appearing in small diameter regions ( $\omega_+$ , top) and large diameter regions ( $\omega_-$ , middle), and a standing wave as a superposition of counter-propagating  $HE_{11}$  guided modes ( $\omega_g$ , bottom).

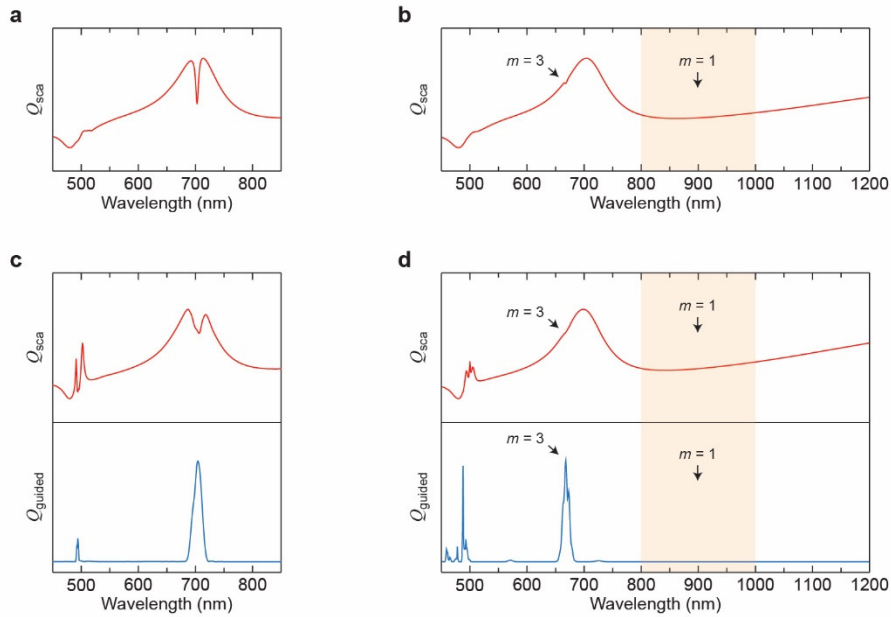

**Supplementary Figure 3 | Disappearance of BGS coupling at long pitch values outside the Mie resonance envelope.** **a-b**, Simulated  $Q_{\text{sca}}$  spectra with  $d = 140$  nm and  $e = 135$  nm for an on-resonance  $p = 420$  nm (**a**) and an off-resonance  $p = 1000$  nm (**b**) NW GSL under plane wave illumination. A scattering dip is not observed for  $p = 1000$  nm in the shaded region of the spectrum where the first-order ( $m = 1$ ) BGS is expected, but the third-order ( $m = 3$ ) mode appears at  $\sim 668$  nm. **c-d**, Simulated  $Q_{\text{sca}}$  spectra (upper graphs) and  $Q_{\text{guided}}$  spectra (lower graphs) for an on-resonance  $p = 420$  nm (**c**) and an off-resonance  $p = 1000$  nm (**d**) GSL-WG under illumination with a Gaussian beam. For the off-resonance structure (panel **d**), no guided power is observed in the shaded region of the spectrum where the first-order ( $m = 1$ ) BGS is expected, but guided power from the third-order ( $m = 3$ ) mode appears at  $\sim 668$  nm.

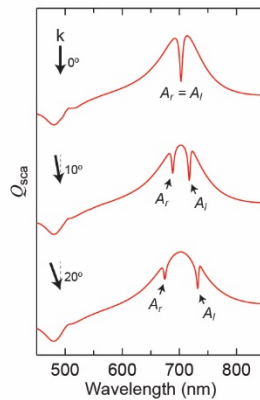

**Supplementary Figure 4 | Incident angle dependence of BGS coupling.** Simulated  $Q_{\text{sca}}$  spectra of a NW GSL with  $d = 140$  nm,  $e = 135$  nm, and  $p = 420$  nm under plane wave illumination at  $0^\circ$  (upper),  $10^\circ$  (middle), and  $20^\circ$  (bottom) with respect to the normal, showing a splitting of the BGS into primarily right-propagating ( $A_r$ ) and left-propagating ( $A_l$ ) BGS modes.

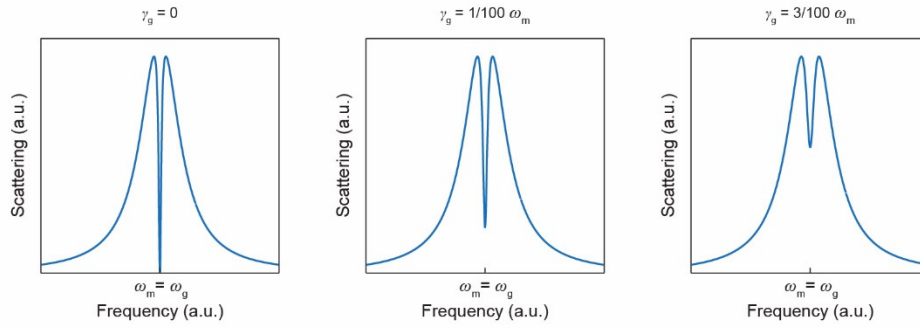

**Supplementary Figure 5 | Schematic plots of Mie-BGS coupling with and without  $\gamma_g$ .** Schematic scattering plots for  $\omega_m = \omega_g$  when  $\gamma_g$  is zero (left),  $1/100 \omega_m$  (middle) and  $3/100 \omega_m$  (right).

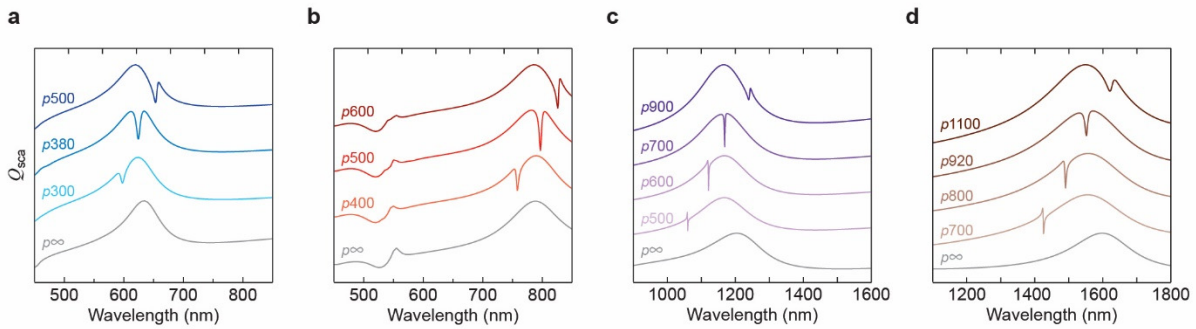

**Supplementary Figure 6 | Diameter dependence and spectral tunability of Mie-BGS coupling.** Simulated  $Q_{sca}$  spectra of GSLs of selected pitches with  $d = 120$  nm,  $e = 115$  nm (a),  $d = 160$  nm,  $e = 155$  nm (b),  $d = 250$  nm,  $e = 245$  nm (c), and  $d = 340$  nm,  $e = 330$  nm (d).

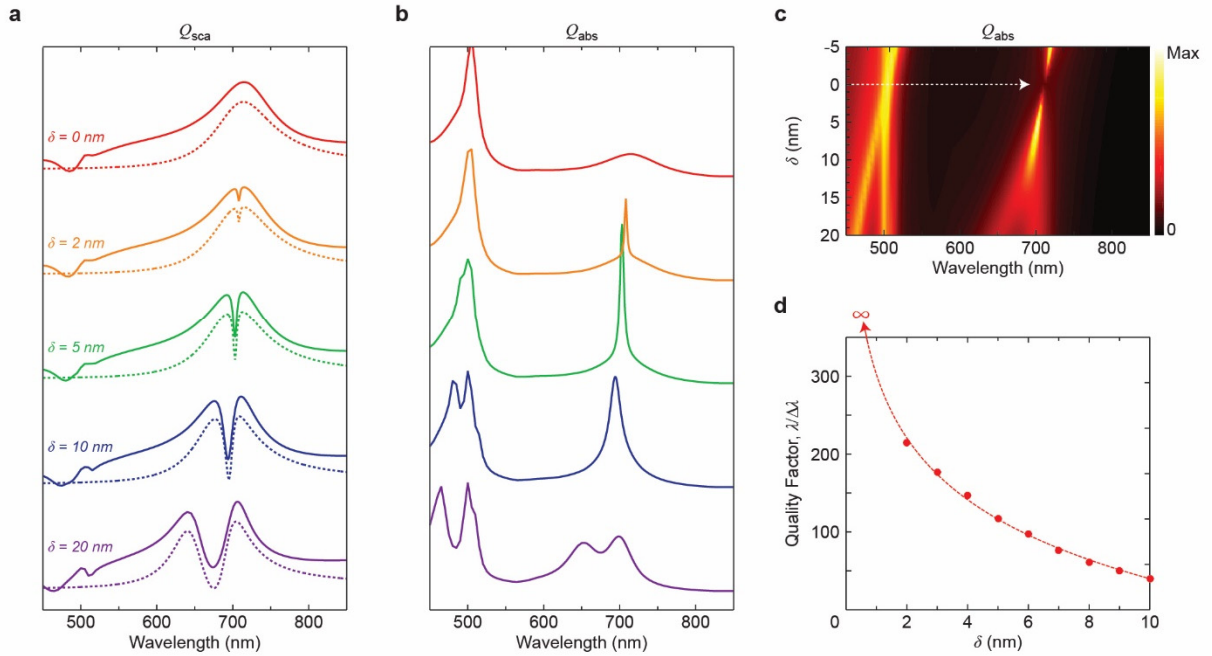

**Supplementary Figure 7 | Effect of modulation depth on bound character of the BGS. a,** Numerically calculated  $Q_{\text{sca}}$  spectra (solid lines) and analytical fit by TCMT (dotted lines) for a NW GSL with  $d=140$  nm,  $p=420$  nm and varying  $\delta$  of 0, 2, 5, 10, and 20 nm.  $\delta=0$  nm corresponds to a NW with uniform diameter. Parameters for TCMT spectra are provided in Table S2. **b,** Numerically calculated  $Q_{\text{abs}}$  spectra of GSLs from panel a, showing a broad background peak for  $\delta=0$  nm and appearance of a high-quality factor absorption peak for non-zero  $\delta$  that eventually bifurcates into two peaks at  $\delta > 15$  nm. **c,** Two-dimensional  $Q_{\text{sca}}$  heat map with vertical and horizontal axes for  $\delta$  and wavelength, respectively, showing a vanishing point at  $\delta=0$  nm that corresponds to a completely bound guided state (BGS). **d,** Quality factor ( $\lambda/\Delta\lambda$ ) calculated from the fit parameters (Supplementary Table 2) used panel b plotted against  $\delta$ , which extrapolates to infinity as  $\delta$  approaches zero.

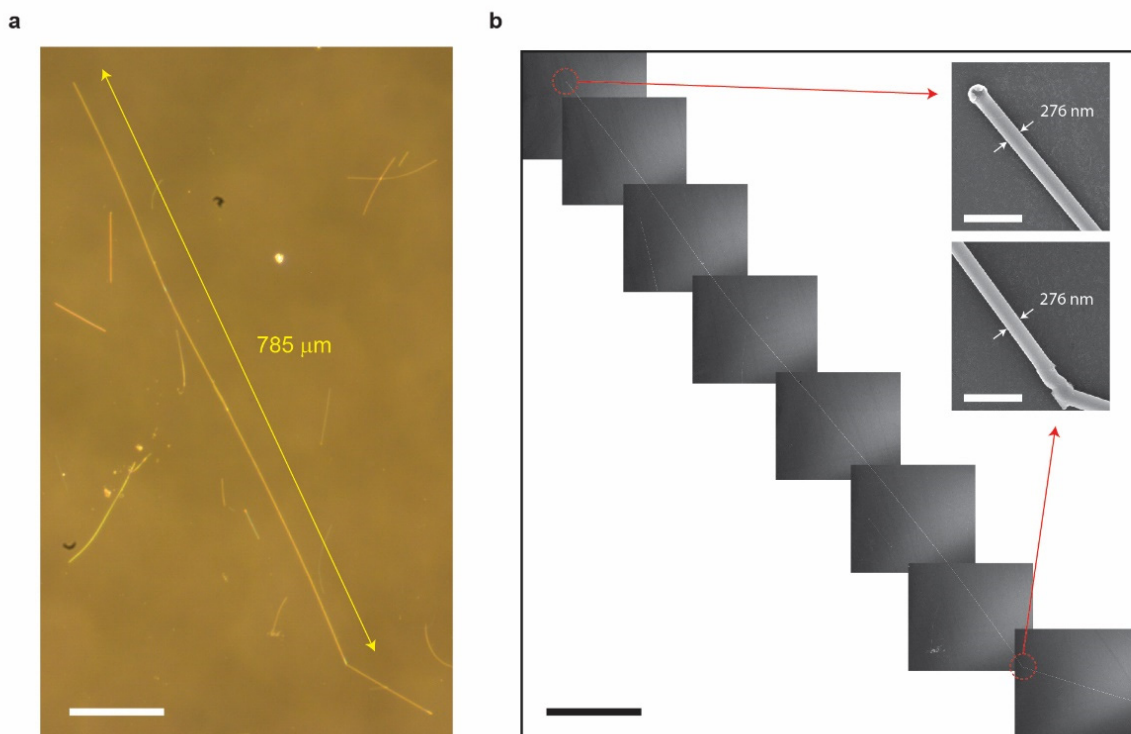

**Supplementary Figure 8 | NW with length of nearly 1 mm with no variation in diameter. a-b,** Optical (a) and SEM (b) images of a NW exhibiting no diameter variation over nearly 1 mm; scale bars, 100  $\mu\text{m}$ . Insets: Magnified views at each end of a straight portion of the NW; scale bars, 1  $\mu\text{m}$ .

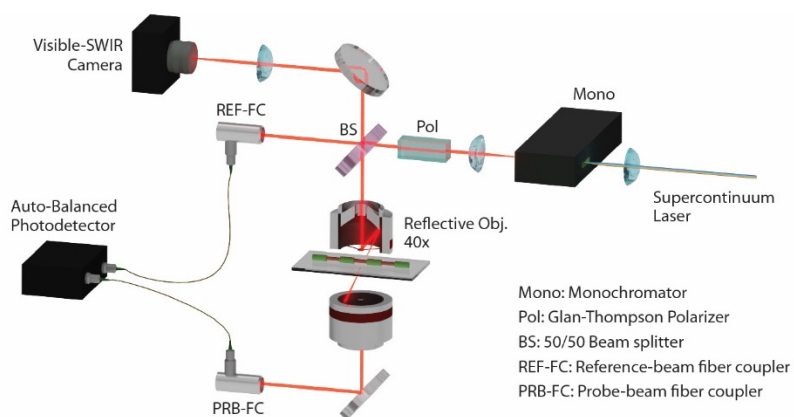

**Supplementary Figure 9 | Instrumental setup.** Laser microscope for polarization-resolved bright-field extinction measurements.

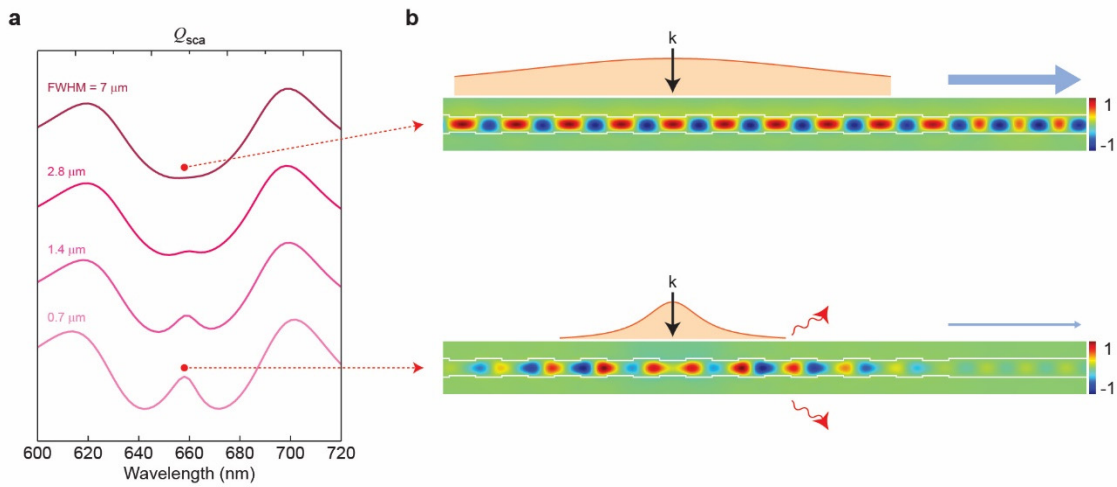

**Supplementary Figure 10 | Effect of Gaussian beam width.** **a**,  $Q_{sca}$  spectra around the scattering dip region of a GSL with  $d = 140$  nm,  $e = 115$  nm and  $p = 400$  nm under focused Gaussian illumination of varying width. Each spectrum is labeled with its Gaussian full-width at half maximum. Absorptive loss is artificially turned off to only account for scattering characteristics. **b**, Calculated magnetic field snapshots at marked locations from panel **a** and Supplementary Movie 3-4, showing coherent coupling to the BGS under a large beam (top) and radiative loss under a small beam (bottom).

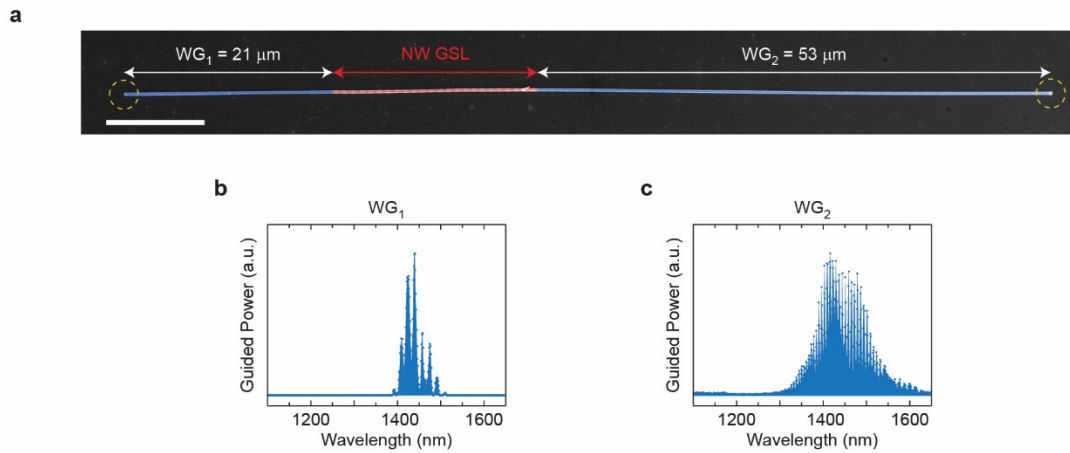

**Supplementary Figure 11 | Fabry-Perot cavity free spectral ranges in WGs of different lengths.** **a**, A NW GSL attached to WGs at both ends in lengths of 21 and 53  $\mu\text{m}$ ; scale bar, 10  $\mu\text{m}$ . **b-c**, Experimental guided spectra collected from WG<sub>1</sub> (**b**) and WG<sub>2</sub> (**c**).

**Supplementary Table 1 | Parameters used in the TCMT for fitting  $Q_{\text{sca}}$  spectra in Figure 1c**

|            | $\lambda_m$ (nm) | $\lambda_g$ (nm) | $\omega_m$ (THz) | $\omega_g$ (THz) | $\omega_c$ (THz) | $\gamma_m$ (THz) | $\gamma_g$ (THz) |
|------------|------------------|------------------|------------------|------------------|------------------|------------------|------------------|
| $p^\infty$ | 700              | 1000             | 2691             | 1884             | - <sup>a</sup>   | 177              | - <sup>a</sup>   |
| $p360$     | 700              | 680              | 2691             | 2770             | 24               | 179              | 5.4              |
| $p420$     | 700              | 703              | 2691             | 2679             | 30               | 179              | 5.4              |
| $p500$     | 700              | 726              | 2691             | 2595             | 30               | 179              | 4.5              |

<sup>a</sup> Any arbitrary value can be chosen.

**Supplementary Table 2 | Parameters used in the TCMT for fitting  $Q_{\text{sca}}$  spectra in Supplementary Figure 7**

| $\delta$ (nm) | $\lambda_m$ (nm) | $\lambda_g$ (nm) | $\omega_m$ (THz) | $\omega_g$ (THz) | $\omega_c$ (THz) | $\gamma_m$ (THz) | $\gamma_g$ (THz) |
|---------------|------------------|------------------|------------------|------------------|------------------|------------------|------------------|
| 0             | 711              | - <sup>a</sup>   | - <sup>a</sup>   | - <sup>a</sup>   | 0                | 177              | - <sup>a</sup>   |
| 2             | 707              | 708              | 2664             | 2661             | 12               | 178              | 5.3              |
| 5             | 700              | 703              | 2691             | 2679             | 30               | 179              | 5.4              |
| 10            | 687              | 695              | 2742             | 2710             | 55               | 183              | 5.5              |
| 20            | 665              | 675              | 2833             | 2791             | 129              | 189              | 5.7              |

<sup>a</sup> Any arbitrary value can be chosen.
