# Supplementary material for: Mie-coupled bound guided states in nanowire geometric superlattices
Source: PubMed Central journal article supplement (PMC6050327; doi:10.1038/s41467-018-05224-2), 2018-07-17
Supplement: 41467_2018_5224_MOESM3_ESM.pdf [file 41467_2018_5224_MOESM3_ESM.pdf]

## Description of Additional Supplementary Files

File Name: Supplementary Movie 1

Description: Time-lapsed animation of a standing wave mode profile of a BGS in a NW GSL with  $d = 140$  nm,  $e = 135$  nm, and  $p = 420$  nm.

File Name: Supplementary Movie 2

Description: Time-lapsed animation of a Mie-coupled BGS propagating from a GSL with  $d = 330$  nm,  $e = 315$  nm, and  $p = 800$  nm into a NW WG.

File Name: Supplementary Movie 3

Description: Time-lapsed animation of a mode profile in a NW GSL with  $d = 140$  nm,  $e = 115$  nm, and  $p = 400$  nm excited by a Gaussian light with FWHM = 7  $\mu$ m.

File Name: Supplementary Movie 4

Description: Time-lapsed animation of a mode profile in a NW GSL with  $d = 140$  nm,  $e = 115$  nm, and  $p = 400$  nm excited by a Gaussian light with FWHM = 700 nm.
